# Supplementary material for: Rapid detection of HPV16/18 based on a CRISPR-Cas13a/Cas12a dual-channel system
Source: Royal Society of Chemistry journal article supplement (doi:10.1039/d2ay01536f), 2022-01-01
Supplement: d2ay01536f1.pdf [file d2ay01536f1.pdf]

## Supporting Information

### Rapid detection of HPV16/18 based on CRISPR-Cas13a/Cas12a dual-channel system

Xue Zheng<sup>a1</sup>, Yuankun Li<sup>b1</sup>, Mingzhu Yuan<sup>a</sup>, Yue Shen<sup>a</sup>, Shuaiyin Chen<sup>a\*</sup> and Guangcai Duan<sup>a\*\*</sup>

<sup>a</sup> College of Public Health, Zhengzhou University, Zhengzhou, 450000, China;

zhengxue0313@163.com (X.Z.); 15660129935@163.com (M.Y.); shenyue5151@163.com (Y.S.);

<sup>b</sup> Obstetrics and Gynecology Department, The Second Affiliated Hospital of Zhengzhou

University, Zhengzhou, 450014, China; 13676979069@163.com (Y.L.)

\* Corresponding author.

\*\* Corresponding author.

E-mail addresses: sychen@zzu.edu.cn (S.C.); geduan@zzu.edu.cn (G.D.)

<sup>1</sup> Xue Zheng and Yuankun Li contributed equally to this work.

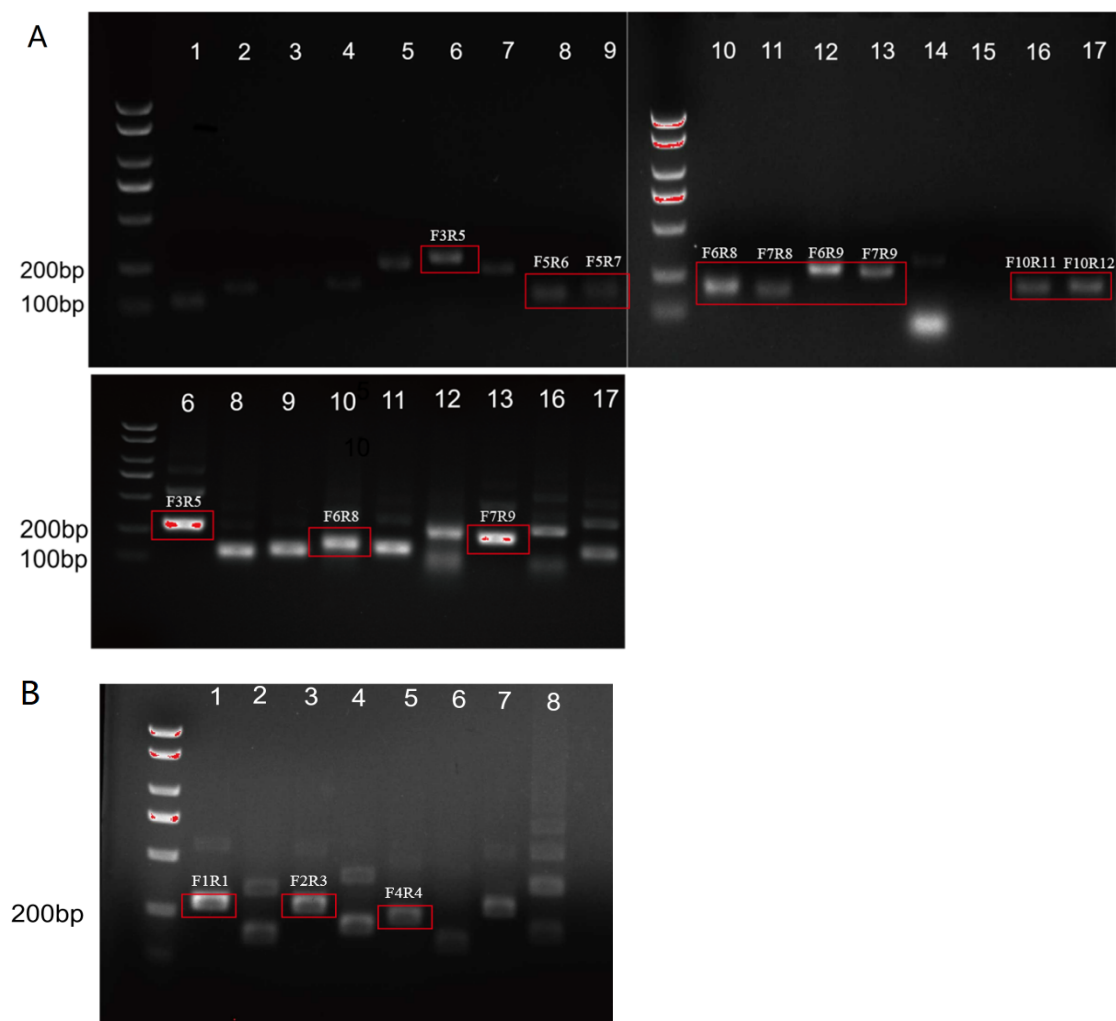

Figure S1. The best RAA primer pairs were screened by DNA gel electrophoresis. (A) Screen the RAA primer pairs for HPV16 L1 gene. (B) Screen the RAA primer pairs for HPV18 L1

gene.

**Table S1. The primers and crRNAs used in this study**

| Primers/crRNAs      | Sequences                                                                       | Targets       |
|---------------------|---------------------------------------------------------------------------------|---------------|
| HPV16L1-F3          | 5'-GTTGTAAGCACGGATGAATATGTTGCACGC-3'                                            | HPV16 L1-T2   |
| HPV16L1-R5          | 5'-CTGGTTTGGGCCTGTGTAGGTGTTGAGGTA-3'                                            |               |
| HPV16L1-F6          | 5'-AATCCAGATACACAGCGGCTGGTTTGGGCCTGT-3'                                         | HPV16 L1-T4.1 |
| HPV16L1-R8          | 5'- GCAGGTGTGGATAATAGAGAATGTATATCT-3'                                           | HPV16 L1-T4.2 |
|                     |                                                                                 | HPV16 L1-T4.3 |
| HPV16L1-F7          | 5'-CGGCTGGTTTGGGCCTGTGTAGGTGTTGAG-3'                                            | HPV16 L1-T4.1 |
| HPV16L1-R9          | 5'- AAACCACCTATAGGGGAACACTGGGGCAAA-3'                                           | HPV16 L1-T4.2 |
|                     |                                                                                 | HPV16 L1-T4.3 |
| HPV16L1-T2-crRNA    | 5'-<br>GAUUUAGACUACCCCAAAAACGAAGGGGACUAAA<br>ACCAGGAAAACCAAACUUUUGGGGUCAGG-3'   |               |
| HPV16L1-T4.3-crRNA  | 5'-<br>GAUUUAGACUACCCCAAAAACGAAGGGGACUAAA<br>ACAUGGCCACUAAUGCCACACC UAAUGGC -3' |               |
|                     |                                                                                 | HPV18L1-T1.1  |
| HPV18L1-F1          | 5'- TGCCCCTGCTATTGGGGAACACTGGGCTAA -3'                                          | HPV18L1-T1.2  |
| HPV18L1-R1          | 5'- TTTACAAATAGACTGACAAATATCCAATGG -3'                                          | HPV18L1-T1.3  |
|                     |                                                                                 | HPV18L1-T1.4  |
| HPV18L1-F2          | 5'- GTTACATAAGGCACAGGGTCATAACAATGG-3'                                           | HPV18L1-T2    |
| HPV18L1-R3          | 5'- TGCTTAAATTTGGTAGCATCATATTGCCCA-3'                                           |               |
| HPV18L1-F4          | 5'- CTGCAGATGTTATGTCCTATATTCATAGTA -3'                                          | HPV18L1-T3    |
| HPV18L1-R4          | 5'- AGGACATAACATCTGCAGTTAAAGTAATAG-3'                                           |               |
|                     | 5'-                                                                             |               |
| HPV18 L1-T1.4-crRNA | UAAUUUCUACUAAGUGUAGAUAGCAGUUAUAGCAG<br>ACAUGUU-3'                               |               |

**Table S2. Excitation and emission wavelengths of LED lamps required for different light emitting groups**

| channel | luminescent groups | Excitation wavelength (nm) | Excitation wavelength (nm) |
|---------|--------------------|----------------------------|----------------------------|
| 1       | FAM                | 455~485                    | ~520                       |
| 2       | CY3                | 540~550                    | ~580                       |
| 3       | TET                | 510~530                    | ~540                       |
| 4       | JOE                | 510~530                    | ~550                       |
| 5       | ROX                | 570~590                    | ~610                       |

**Table S3. Fluorescence detection system for CRISPR-Cas13a/Cas12a dual-channel detection system**

| Component                                        | Volume to add ( $\mu\text{L}$ ) |
|--------------------------------------------------|---------------------------------|
| Cas13a ( $1\mu\text{M}$ )                        | $1\mu\text{L}$                  |
| crRNA ( $100\text{ng}/\mu\text{L}$ )             | $1\mu\text{L}$                  |
| Cas12a ( $1\mu\text{M}$ )                        | $2\mu\text{L}$                  |
| crRNA ( $30\text{ng}/\mu\text{L}$ )              | $1\mu\text{L}$                  |
| T7 RNA polymerase mix                            | $1\mu\text{L}$                  |
| rNTP Mix                                         | $1\mu\text{L}$                  |
| RNAase inhibitors                                | $1\mu\text{L}$                  |
| $\text{Mgcl}_2$ ( $1\text{M}$ )                  | $0.25\mu\text{L}$               |
| Cas13a- Fluorescent reporter ( $2\mu\text{M}$ )  | $1.25\mu\text{L}$               |
| Cas12a- Fluorescent reporter ( $10\mu\text{M}$ ) | $1\mu\text{L}$                  |
| multiplex RAA amplification product              | $5\mu\text{L}$                  |
| RNase-Free Water                                 | to $25\mu\text{L}$              |
| Total                                            | $25\mu\text{L}$                 |

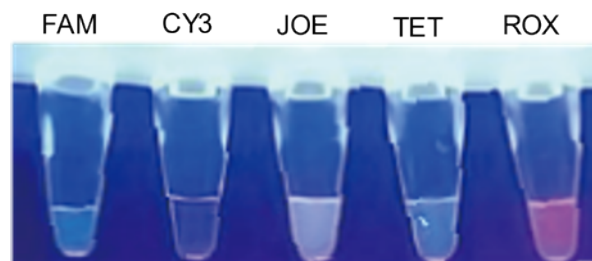

**Figure S2. Fluorescence imaging of five DNA probes under UV cut gel recovery instrument**
